# Supplementary material for: Pulmonary Responses of Sprague-Dawley Rats in Single Inhalation Exposure to Graphene Oxide Nanomaterials
Source: Hindawi journal article supplement (doi:10.1155/2015/376756), 2015-01-01
Supplement: f1 [file 376756.f1.pdf]

## Supplements

Suppl. 1. Food consumption of rats (g/animal) during the recovery period

| Group           | Unexposed      | Low            | High            |
|-----------------|----------------|----------------|-----------------|
| 7-day recovery  | 29.35±0.33 (7) | 28.8±0.32 (8)  | 29.22±0.76 (8)  |
| 14-day recovery | 28.32±0.57 (3) | 32.77±1.12 (4) | 31.00±1.25x (4) |

( ): number of animal

Suppl. 2. Body weight of rats (g/animal) before and after graphene oxide exposure

| Group                         | Unexposed        | Low              | High             |
|-------------------------------|------------------|------------------|------------------|
| Before exposure               | 290.13±2.53 (12) | 298.32±2.16 (12) | 295.87±2.64 (12) |
| Necropsy<br>(1-day recovery)  | 268.75±2.02 (4)  | 266.85±1.01 (4)  | 264.10±1.18 (4)  |
| Necropsy<br>(7-day recovery)  | 312.17±2.83 (4)  | 320.6±1.33 (4)   | 321.62±4.21 (4)  |
| Necropsy<br>(14-day recovery) | 351.93±4.73 (3)  | 366.37±3.77 (4)  | 363.65±2.78 (4)  |

( ): number of animal

Suppl. 3. Gross findings of rats after 1 day following graphene oxide exposure

| Organ          | Observation | Unexposed | Low | High |
|----------------|-------------|-----------|-----|------|
| TESTIS (LEFT)  | Normal      | 4/4       | 4/4 | 4/4  |
| TESTIS (RIGHT) | Normal      | 4/4       | 4/4 | 4/4  |
| KIDNEY (LEFT)  | Normal      | 4/4       | 4/4 | 4/4  |
| KIDNEY (RIGHT) | Normal      | 4/4       | 4/4 | 4/4  |
| SPLEEN         | Normal      | 4/4       | 4/4 | 4/4  |
| LIVER          | Normal      | 4/4       | 4/4 | 4/4  |
| LUNG (LEFT)    | Normal      | 4/4       | 4/4 | 4/4  |
| BRAIN          | Normal      | 4/4       | 4/4 | 4/4  |

Suppl. 4. Gross findings of rats after 7 days following graphene oxide exposure

| Organ          | Observation | Unexposed | Low | High |
|----------------|-------------|-----------|-----|------|
| TESTIS (LEFT)  | Normal      | 4/4       | 4/4 | 4/4  |
| TESTIS (RIGHT) | Normal      | 4/4       | 4/4 | 4/4  |
| KIDNEY (LEFT)  | Normal      | 4/4       | 4/4 | 4/4  |
| KIDNEY (RIGHT) | Normal      | 4/4       | 4/4 | 4/4  |
| SPLEEN         | Normal      | 4/4       | 4/4 | 4/4  |
| LIVER          | Normal      | 4/4       | 4/4 | 4/4  |
| LUNG (LEFT)    | Normal      | 4/4       | 4/4 | 4/4  |
| BRAIN          | Normal      | 4/4       | 4/4 | 4/4  |

Suppl. 5. Gross findings of rats after 14 days following graphene oxide exposure

| Organ          | Observation | Unexposed | Low | High |
|----------------|-------------|-----------|-----|------|
| TESTIS (LEFT)  | Normal      | 3/4       | 4/4 | 4/4  |
| TESTIS (RIGHT) | Normal      | 3/4       | 4/4 | 4/4  |
| KIDNEY (LEFT)  | Normal      | 3/4       | 4/4 | 4/4  |
| KIDNEY (RIGHT) | Normal      | 3/4       | 4/4 | 4/4  |
| SPLEEN         | Normal      | 3/4       | 4/4 | 4/4  |
| LIVER          | Normal      | 3/4       | 4/4 | 4/4  |
| LUNG (LEFT)    | Normal      | 3/4       | 4/4 | 4/4  |
| BRAIN          | Normal      | 3/4       | 4/4 | 4/4  |

Suppl. 6. Absolute organ weight of rats (g/animal) after 1 day following graphene oxide exposure

| Organ          | Unexposed       | Low             | High           |
|----------------|-----------------|-----------------|----------------|
| BODY WEIGHT    | 268.87±2.02 (4) | 266.85±1.01 (4) | 264.10±1.18(4) |
| TESTIS (LEFT)  | 1.40±0.05 (4)   | 1.37±0.04 (4)   | 1.24±0.03 (4)  |
| TESTIS (RIGHT) | 1.37±0.05 (4)   | 1.34±0.03 (4)   | 1.25±0.03 (4)  |
| KIDNEY (LEFT)  | 1.08±0.01 (4)   | 1.09±0.02 (4)   | 1.07±0.02 (4)  |
| KIDNEY (RIGHT) | 1.07±0.00 (4)   | 1.08±0.02 (4)   | 1.01±0.02 (4)  |
| SPLEEN         | 0.61±0.03 (4)   | 0.65±0.04 (4)   | 0.61±0.02 (4)  |
| LIVER          | 8.31±0.04 (4)   | 8.93±0.18 (4)   | 8.31±0.15 (4)  |
| LUNG (LEFT)    | 0.48±0.09 (4)   | 0.44±0.02 (4)   | 0.43±0.02 (4)  |
| BRAIN          | 2.06±0.01 (4)   | 1.95±0.04 (4)   | 2.03±0.03 (4)  |

( ): number of animal

Suppl. 7. Absolute organ weight of rats (g/animal) after 7 days following graphene oxide exposure

| Organ          | Unexposed       | Low             | High            |
|----------------|-----------------|-----------------|-----------------|
| BODY WEIGHT    | 312.17±2.83 (4) | 320.60±1.33 (4) | 321.62±4.21 (4) |
| TESTIS (LEFT)  | 1.36±0.01 (4)   | 1.43±0.01 (4)   | 1.39±0.02 (4)   |
| TESTIS (RIGHT) | 1.32±0.01 (4)   | 1.42±0.00 (4)   | 1.36±0.03 (4)   |
| KIDNEY (LEFT)  | 1.21±0.03 (4)   | 1.30±0.03 (4)   | 1.28±0.03 (4)   |
| KIDNEY (RIGHT) | 1.20±0.01 (4)   | 1.24±0.02 (4)   | 1.24±0.05 (4)   |
| SPLEEN         | 0.72±0.04 (4)   | 0.67±0.04 (4)   | 0.67±0.04 (4)   |
| LIVER          | 9.91±0.19 (4)   | 10.62±0.22 (4)  | 10.15±0.39 (4)  |
| LUNG (LEFT)    | 0.43±0.01 (4)   | 0.42±0.02 (4)   | 0.41±0.01 (4)   |
| BRAIN          | 2.05±0.06 (4)   | 2.04±0.07 (4)   | 1.97±0.02 (4)   |

( ): number of animal

Suppl. 8. Absolute organ weight of rats (g/animal) after 14 days following graphene oxide exposure

| Organ          | Unexposed         | Low               | High              |
|----------------|-------------------|-------------------|-------------------|
| BODY WEIGHT    | 351.93 ± 4.73 (3) | 366.37 ± 3.77 (4) | 363.65 ± 2.78 (4) |
| TESTIS (LEFT)  | 1.75 ± 0.08 (3)   | 1.85 ± 0.07 (4)   | 1.55 ± 0.04 (4)   |
| TESTIS (RIGHT) | 1.68 ± 0.02 (3)   | 1.77 ± 0.07 (4)   | 1.51 ± 0.06 (4)   |
| KIDNEY (LEFT)  | 1.53 ± 0.03 (3)   | 1.53 ± 0.05 (4)   | 1.46 ± 0.04 (4)   |
| KIDNEY (RIGHT) | 1.53 ± 0.03 (3)   | 1.52 ± 0.06 (4)   | 1.47 ± 0.05 (4)   |
| SPLEEN         | 0.84 ± 0.07 (3)   | 0.76 ± 0.06 (4)   | 0.78 ± 0.07 (4)   |
| LIVER          | 11.80 ± 0.42 (3)  | 11.38 ± 0.50 (4)  | 11.76 ± 0.15 (4)  |
| LUNG (LEFT)    | 0.48 ± 0.02 (3)   | 0.48 ± 0.01 (4)   | 0.42 ± 0.01 (4)   |
| BRAIN          | 2.33 ± 0.08 (3)   | 2.24 ± 0.06 (4)   | 2.10 ± 0.07 (4)   |

Suppl. 9. Relative organ weight of rats (g/animal) after 1 day following graphene oxide exposure

| Organ          | Unexposed       | Low             | High            |
|----------------|-----------------|-----------------|-----------------|
| BODY WEIGHT    | 268.87±2.02 (4) | 266.85±1.01 (4) | 264.10±1.18 (4) |
| TESTIS (LEFT)  | 0.52±0.02 (4)   | 0.51±0.01 (4)   | 0.46±0.01 (4)   |
| TESTIS (RIGHT) | 0.51±0.02 (4)   | 0.50±0.01 (4)   | 0.47±0.01 (4)   |
| KIDNEY (LEFT)  | 0.40±0.00 (4)   | 0.40±0.00 (4)   | 0.40±0.01 (4)   |
| KIDNEY (RIGHT) | 0.39±0.00 (4)   | 0.40±0.01 (4)   | 0.38±0.01 (4)   |
| SPLEEN         | 0.23±0.01 (4)   | 0.24±0.01 (4)   | 0.23±0.01 (4)   |
| LIVER          | 3.09±0.02 (4)   | 3.34±0.06 (4)   | 3.14±0.06 (4)   |
| LUNG (LEFT)    | 0.17±0.03 (4)   | 0.16±0.01 (4)   | 0.16±0.00 (4)   |
| BRAIN          | 0.76±0.01 (4)   | 0.73±0.02 (4)   | 0.76±0.01 (4)   |

( ): number of animal

Suppl. 10. Relative organ weight of rats (g/animal) after 7 days following graphene oxide exposure

| Organ          | Unexposed       | Low             | High            |
|----------------|-----------------|-----------------|-----------------|
| BODY WEIGHT    | 312.17±2.83 (4) | 320.60±1.33 (4) | 321.62±4.21 (4) |
| TESTIS (LEFT)  | 0.43±0.00 (4)   | 0.44±0.00 (4)   | 0.43±0.01 (4)   |
| TESTIS (RIGHT) | 0.42±0.00 (4)   | 0.44±0.00 (4)   | 0.42±0.01 (4)   |
| KIDNEY (LEFT)  | 0.39±0.01 (4)   | 0.40±0.00 (4)   | 0.39±0.00 (4))  |
| KIDNEY (RIGHT) | 0.38±0.00 (4)   | 0.38±0.00 (4)   | 0.38±0.01 (4)   |
| SPLEEN         | 0.23±0.01 (4)   | 0.21±0.01 (4)   | 0.21±0.01 (4)   |
| LIVER          | 3.17±0.07 (4)   | 3.31±0.06 (4)   | 3.15±0.01 (4)   |
| LUNG (LEFT)    | 0.13±0.00 (4)   | 0.13±0.00 (4)   | 0.12±0.00 (4)   |

|       |               |               |               |
|-------|---------------|---------------|---------------|
| BRAIN | 0.65±0.02 (4) | 0.63±0.02 (4) | 0.61±0.01 (4) |
|-------|---------------|---------------|---------------|

( ): number of animal

Suppl. 11. Relative organ weight of rats (g/animal) after 14 days following graphene oxide exposure

| Organ          | Unexposed       | Low              | High            |
|----------------|-----------------|------------------|-----------------|
| BODY WEIGHT    | 351.93±4.73 (3) | 366.37±0.377 (4) | 363.65±2.78 (4) |
| TESTIS (LEFT)  | 0.49±0.02 (3)   | 0.50±0.02 (4)    | 0.42±0.00 (4)   |
| TESTIS (RIGHT) | 0.47±0.00 (3)   | 0.48±0.02 (4)    | 0.41±0.01 (4)   |
| KIDNEY (LEFT)  | 0.43±0.01 (3)   | 0.41±0.01 (4)    | 0.40±0.01 (4)   |
| KIDNEY (RIGHT) | 0.43±0.01 (3)   | 0.41±0.01 (4)    | 0.40±0.01 (4)   |
| SPLEEN         | 0.24±0.02 (3)   | 0.20±0.01 (4)    | 0.21±0.02 (4)   |
| LIVER          | 3.35±0.12 (3)   | 3.10±0.12 (4)    | 3.23±0.04 (4)   |
| LUNG (LEFT)    | 0.13±0.00 (3)   | 0.13±0.00 (4)    | 0.11±0.00 (4)   |
| BRAIN          | 0.66±0.01 (3)   | 0.61±0.01 (4)    | 0.58±0.02 (4)   |

( ): number of animal
